# Supplementary material
Source: PubMed Central journal article supplement (PMC8293866)
Supplement: NIHMS1657418-supplement-317219_Major_Resources_Table.pdf [file NIHMS1657418-supplement-317219_Major_Resources_Table.pdf]

## Major Resources Table

In order to allow validation and replication of experiments, all essential research materials listed in the Methods should be included in the Major Resources Table below. Authors are encouraged to use public repositories for protocols, data, code, and other materials and provide persistent identifiers and/or links to repositories when available. Authors may add or delete rows as needed.

### Animals (in vivo studies)

| Species             | Vendor or Source | Background Strain | Sex  | Persistent ID / URL                                                                                                                           |
|---------------------|------------------|-------------------|------|-----------------------------------------------------------------------------------------------------------------------------------------------|
| <i>Mus musculus</i> | Janvier Labs     | C57BL/6J Mouse    | Male | <a href="https://www.janvier-labs.com/en/fiche_produit/c57bl-6jrz_mouse/">https://www.janvier-labs.com/en/fiche_produit/c57bl-6jrz_mouse/</a> |

### Antibodies

| Target antigen                               | Vendor or Source          | Catalog # | Working concentration | Persistent ID / URL                                                                                                                                                                                                                                                                                                                                                                               |
|----------------------------------------------|---------------------------|-----------|-----------------------|---------------------------------------------------------------------------------------------------------------------------------------------------------------------------------------------------------------------------------------------------------------------------------------------------------------------------------------------------------------------------------------------------|
| NF- $\kappa$ B p65                           | Cell Signaling Technology | 8242s     | 1:1000                | <a href="https://www.cellsignal.com/products/primary-antibodies/nf-kb-p65-d14e12-xp-rabbit-mab/8242?site-search-type=Products&amp;N=4294956287&amp;Ntt=8242s&amp;fromPage=plp&amp;_requestid=40778">https://www.cellsignal.com/products/primary-antibodies/nf-kb-p65-d14e12-xp-rabbit-mab/8242?site-search-type=Products&amp;N=4294956287&amp;Ntt=8242s&amp;fromPage=plp&amp;_requestid=40778</a> |
| phospho-I $\kappa$ B $\alpha$ (Ser32/36)     | Cell Signaling Technology | 9246s     | 1:1000                | <a href="https://www.cellsignal.com/products/primary-antibodies/phospho-ikba-ser32-36-5a5-mouse-mab/9246?site-search-type=Products">https://www.cellsignal.com/products/primary-antibodies/phospho-ikba-ser32-36-5a5-mouse-mab/9246?site-search-type=Products</a>                                                                                                                                 |
| I $\kappa$ B $\alpha$                        | Cell Signaling Technology | 4812s     | 1:1000                | <a href="https://www.cellsignal.com/products/primary-antibodies/ikba-44d4-rabbit-mab/4812?site-search-type=Products">https://www.cellsignal.com/products/primary-antibodies/ikba-44d4-rabbit-mab/4812?site-search-type=Products</a>                                                                                                                                                               |
| NLRP3                                        | Novus                     | 12446     | 1:1000                | <a href="https://www.novusbio.com/products/nlrp3-nalp3-antibody_nbp2-12446">https://www.novusbio.com/products/nlrp3-nalp3-antibody_nbp2-12446</a>                                                                                                                                                                                                                                                 |
| DNMT1                                        | Cell Signaling Technology | 5032s     | 1:1000                | <a href="https://www.cellsignal.com/products/primary-antibodies/dnmt1-d63a6-xp-rabbit-mab/5032?site-search-type=Products&amp;N=4294956287&amp;Ntt=5032s&amp;fromPage=plp&amp;_requestid=42722">https://www.cellsignal.com/products/primary-antibodies/dnmt1-d63a6-xp-rabbit-mab/5032?site-search-type=Products&amp;N=4294956287&amp;Ntt=5032s&amp;fromPage=plp&amp;_requestid=42722</a>           |
| Caspase 1                                    | Cell Signaling Technology | 24232     | 1:1000                | <a href="https://www.cellsignal.com/products/primary-antibodies/caspase-1-e2z1c-rabbit-mab/24232?_=1597998405239&amp;Ntt=CASPASE%201&amp;tahead=true">https://www.cellsignal.com/products/primary-antibodies/caspase-1-e2z1c-rabbit-mab/24232?_=1597998405239&amp;Ntt=CASPASE%201&amp;tahead=true</a>                                                                                             |
| IL-1 $\beta$                                 | Cell Signaling Technology | 12242     | 1:1000                | <a href="https://www.cellsignal.com/products/primary-antibodies/il-1b-3a6-mouse-mab/12242?_=1597998640117&amp;Ntt=il1%20beta&amp;tahead=true">https://www.cellsignal.com/products/primary-antibodies/il-1b-3a6-mouse-mab/12242?_=1597998640117&amp;Ntt=il1%20beta&amp;tahead=true</a>                                                                                                             |
| Tri-Methyl-Histone H3 (Lys9)                 | Cell Signaling Technology | 13969     | 1:1000                | <a href="https://www.cellsignal.com/products/primary-antibodies/tri-methyl-histone-h3-lys9-d4w1u-rabbit-mab/13969?site-search-type=Products">https://www.cellsignal.com/products/primary-antibodies/tri-methyl-histone-h3-lys9-d4w1u-rabbit-mab/13969?site-search-type=Products</a>                                                                                                               |
| VE-Cadherin                                  | Cell Signaling Technology | 2500      | 1:50                  | <a href="https://www.cellsignal.com/products/primary-antibodies/ve-cadherin-d87f2-xp-rabbit-mab/2500?site-search-type=Products">https://www.cellsignal.com/products/primary-antibodies/ve-cadherin-d87f2-xp-rabbit-mab/2500?site-search-type=Products</a>                                                                                                                                         |
| SIRT1                                        | Cell Signaling Technology | 8469      | 1:1000                | <a href="https://www.cellsignal.com/products/primary-antibodies/sirt1-1f3-mouse-mab/8469?site-search-type=Products">https://www.cellsignal.com/products/primary-antibodies/sirt1-1f3-mouse-mab/8469?site-search-type=Products</a>                                                                                                                                                                 |
| Anti-Monocyte + Macrophage antibody [MOMA-2] | Abcam                     | ab33451   | 1:50                  | <a href="https://www.abcam.com/monocyte--macrophage-antibody-moma-2-ab33451.html">https://www.abcam.com/monocyte--macrophage-antibody-moma-2-ab33451.html</a>                                                                                                                                                                                                                                     |
| Rabbit anti-GAPDH                            | Sigma Aldrich             | G9545     | 1:10000               | <a href="https://www.sigmaaldrich.com/catalog/product/sigma/g9545?lang=en&amp;region=CA">https://www.sigmaaldrich.com/catalog/product/sigma/g9545?lang=en&amp;region=CA</a>                                                                                                                                                                                                                       |

|                                                                                           |                                                                                                                                     |         |        |                                                                                                                                                                                                                                                                                       |
|-------------------------------------------------------------------------------------------|-------------------------------------------------------------------------------------------------------------------------------------|---------|--------|---------------------------------------------------------------------------------------------------------------------------------------------------------------------------------------------------------------------------------------------------------------------------------------|
| Anti-mouse IgG, HRP-linked Antibody                                                       | Cell Signaling Technology                                                                                                           | 7076    | 1:4000 | <a href="https://www.cellsignal.com/products/secondary-antibodies/anti-mouse-igg-hrp-linked-antibody/7076?site-search-type=Products">https://www.cellsignal.com/products/secondary-antibodies/anti-mouse-igg-hrp-linked-antibody/7076?site-search-type=Products</a>                   |
| Anti-rabbit IgG, HRP-linked Antibody                                                      | Cell Signaling Technology                                                                                                           | 7074    | 1:4000 | <a href="https://www.cellsignal.com/products/secondary-antibodies/anti-rabbit-igg-hrp-linked-antibody/7074?site-search-type=Products">https://www.cellsignal.com/products/secondary-antibodies/anti-rabbit-igg-hrp-linked-antibody/7074?site-search-type=Products</a>                 |
| Goat anti-Rabbit IgG (H+L) Highly Cross-Adsorbed Secondary Antibody, Alexa Fluor Plus 647 | Invitrogen                                                                                                                          | A-11035 | 1:300  | <a href="https://www.thermofisher.com/antibody/product/Goat-anti-Rabbit-IgG-H-L-Highly-Cross-Adsorbed-Secondary-Antibody-Polyclonal/A-A32733">https://www.thermofisher.com/antibody/product/Goat-anti-Rabbit-IgG-H-L-Highly-Cross-Adsorbed-Secondary-Antibody-Polyclonal/A-A32733</a> |
| Goat anti-Rabbit IgG (H+L), Superclonal™ Recombinant Secondary Antibody, Alexa Fluor 488  | Invitrogen                                                                                                                          | A27034  | 1:300  | <a href="https://www.thermofisher.com/antibody/product/Goat-anti-Rabbit-IgG-H-L-Secondary-Antibody-Recombinant-Polyclonal/A27034">https://www.thermofisher.com/antibody/product/Goat-anti-Rabbit-IgG-H-L-Secondary-Antibody-Recombinant-Polyclonal/A27034</a>                         |
| MAPC 1591, MPC1609                                                                        | Dr. Charles T. Esmon<br>Laboratory of Coagulation Biology,<br>Oklahoma Medical Research Foundation,<br>Oklahoma City, United States |         |        |                                                                                                                                                                                                                                                                                       |
| 3K3A-aPC                                                                                  | Dr. John H. Griffin,<br>Department of Molecular Medicine,<br>The Scripps Research Institute, La Jolla, CA, USA                      |         |        |                                                                                                                                                                                                                                                                                       |

## Reagents and Kits

| Reagents                             | Vendor or Source | Catalog #     | Persistent ID / URL                                                                                                                                                                                                                       |
|--------------------------------------|------------------|---------------|-------------------------------------------------------------------------------------------------------------------------------------------------------------------------------------------------------------------------------------------|
| Hematoxylin solution acc. to Gill II | CARL ROTH        | T864.2        | <a href="https://www.carlroth.com/com/en/cytological-routine-staining/hematoxylin-solution-acc-to-gill-ii/p/t864.2">https://www.carlroth.com/com/en/cytological-routine-staining/hematoxylin-solution-acc-to-gill-ii/p/t864.2</a>         |
| Agarose Standard                     | CARL ROTH        | 3810.3        | <a href="https://www.carlroth.com/com/en/agarose-gelling-reagents/agarose-standard/p/3810.3">https://www.carlroth.com/com/en/agarose-gelling-reagents/agarose-standard/p/3810.3</a>                                                       |
| Aqueous Mounting Medium              | ZYTOMED          | ZY-AMT030     | <a href="https://www.zytomed-systems.com/storage/uploads/datasheets/en/ZY-AMT_EN.pdf">https://www.zytomed-systems.com/storage/uploads/datasheets/en/ZY-AMT_EN.pdf</a>                                                                     |
| Takyon™ Rox SYBR Core Kit blue dTTP  | Takyon           | UF-RSCT-B0201 | <a href="https://www.eurogentec.com/en/catalog/takyon-rox-sybr-core-kit-blue-dtpp~b177cfdf-bb9a-4893-8b7f-f49288f8bab4">https://www.eurogentec.com/en/catalog/takyon-rox-sybr-core-kit-blue-dtpp~b177cfdf-bb9a-4893-8b7f-f49288f8bab4</a> |
| Trichrome Stain (Masson) Kit         | Sigma Aldrich    | HT15          | <a href="https://www.sigmaaldrich.com/catalog/product/sigma/ht15?lang=en&amp;region=CA">https://www.sigmaaldrich.com/catalog/product/sigma/ht15?lang=en&amp;region=CA</a>                                                                 |
| RNeasy Mini Kit                      | QIAGEN           | 74106         | <a href="https://www.qiagen.com/de/shop//sample-technologies/rna/rneasy-mini-kit/">https://www.qiagen.com/de/shop//sample-technologies/rna/rneasy-mini-kit/</a>                                                                           |

|                                            |                                     |                |                                                                                                                                                                                                                                                                                                                                                                 |
|--------------------------------------------|-------------------------------------|----------------|-----------------------------------------------------------------------------------------------------------------------------------------------------------------------------------------------------------------------------------------------------------------------------------------------------------------------------------------------------------------|
| cDNA synthesis Kit                         | Invitrogen                          | 18080051       | <a href="https://www.thermofisher.com/order/catalog/product/18080051?SID=srch-hj-18080051#/18080051?SID=srch-hj-18080051">https://www.thermofisher.com/order/catalog/product/18080051?SID=srch-hj-18080051#/18080051?SID=srch-hj-18080051</a>                                                                                                                   |
| TTC                                        | Sigma-Aldrich                       | T8877          | <a href="https://www.sigmaaldrich.com/catalog/product/sigma/t8877?lang=en&amp;region=CA">https://www.sigmaaldrich.com/catalog/product/sigma/t8877?lang=en&amp;region=CA</a>                                                                                                                                                                                     |
| Pierce™ BCA protein assay kit              | Perbio Science                      | 23227          | <a href="https://www.thermofisher.com/order/catalog/product/23227#/23227">https://www.thermofisher.com/order/catalog/product/23227#/23227</a>                                                                                                                                                                                                                   |
| Vector shield mounting medium with DAPI    | Vector Laboratories                 | H-1200-10      | <a href="https://vectorlabs.com/vectashieldr-plus-antifade-mounting-medium-with-dapi.html">https://vectorlabs.com/vectashieldr-plus-antifade-mounting-medium-with-dapi.html</a>                                                                                                                                                                                 |
| PVDF membrane                              | Merck Millipore                     | IPVH00010      | <a href="https://www.merckmillipore.com/DE/de/search/IPVH00010?search=&amp;TrackingSearchType=SB++homepage-search-box++OLD&amp;SearchContextPageletUUID=&amp;SearchTerm=IPVH00010">https://www.merckmillipore.com/DE/de/search/IPVH00010?search=&amp;TrackingSearchType=SB++homepage-search-box++OLD&amp;SearchContextPageletUUID=&amp;SearchTerm=IPVH00010</a> |
| Immobilion™ chemiluminescent HRP substrate | Merck Millipore                     | WBKLS0500      | <a href="https://www.merckmillipore.com/DE/de/search/WBKLS0500?search=&amp;TrackingSearchType=SB++Search+Result+Search+Box&amp;SearchContextPageletUUID=&amp;SearchTerm=WBKLS0500">https://www.merckmillipore.com/DE/de/search/WBKLS0500?search=&amp;TrackingSearchType=SB++Search+Result+Search+Box&amp;SearchContextPageletUUID=&amp;SearchTerm=WBKLS0500</a> |
| Powdered milk                              | CARL ROTH                           | T145.2         | <a href="https://www.carlroth.com/de/de/blockierungsreagenzien/milchpulver/p/t145.2">https://www.carlroth.com/de/de/blockierungsreagenzien/milchpulver/p/t145.2</a>                                                                                                                                                                                             |
| Albumin fraction                           | CARL ROTH                           | 8076.2         | <a href="https://www.carlroth.com/de/de/blockierungsreagenzien/albumin-fraktion-v/p/8076.2">https://www.carlroth.com/de/de/blockierungsreagenzien/albumin-fraktion-v/p/8076.2</a>                                                                                                                                                                               |
| Rotiphorese® Gel                           | CARL ROTH                           | 3029.1         | <a href="https://www.carlroth.com/de/de/page-fertigloesungen/rotiphoreseigel-30-%28375%3A1%29/p/3029.1">https://www.carlroth.com/de/de/page-fertigloesungen/rotiphoreseigel-30-%28375%3A1%29/p/3029.1</a>                                                                                                                                                       |
| Donkey serum                               | Sigma Aldrich                       | D9663          | <a href="https://www.sigmaaldrich.com/catalog/product/sigma/d9663?lang=en&amp;region=CA">https://www.sigmaaldrich.com/catalog/product/sigma/d9663?lang=en&amp;region=CA</a>                                                                                                                                                                                     |
| Trizol Reagent                             | Life Technologies                   | 15596018       | <a href="https://www.thermofisher.com/order/catalog/product/15596018?SID=srch-hj-15596018#/15596018?SID=srch-hj-15596018">https://www.thermofisher.com/order/catalog/product/15596018?SID=srch-hj-15596018#/15596018?SID=srch-hj-15596018</a>                                                                                                                   |
| Phosphate Buffer Saline (PBS)              | Thermo Fisher Scientific            | 10-010-031     | <a href="https://www.thermofisher.com/order/catalog/product/10010031?SID=srch-hj-10010031#/10010031?SID=srch-hj-10010031">https://www.thermofisher.com/order/catalog/product/10010031?SID=srch-hj-10010031#/10010031?SID=srch-hj-10010031</a>                                                                                                                   |
| Rompun 2%                                  | Bayer                               |                | <a href="https://covetrus.de/a/rompun-2prozent-flasche-25-ml/02.2049.25256.770081">https://covetrus.de/a/rompun-2prozent-flasche-25-ml/02.2049.25256.770081</a>                                                                                                                                                                                                 |
| Ketamine                                   | Beta-pharm                          |                |                                                                                                                                                                                                                                                                                                                                                                 |
| Tween-20                                   | CARL ROTH                           | 9127.1         | <a href="https://www.carlroth.com/de/de/reagenzien-zur-dna-rna-analyse/tween-20/p/9127.1">https://www.carlroth.com/de/de/reagenzien-zur-dna-rna-analyse/tween-20/p/9127.1</a>                                                                                                                                                                                   |
| 2-Propanol                                 | CARL ROTH                           | CP41.1         | <a href="https://www.carlroth.com/de/de/von-a-bis-z/2-propanol/p/cp41.1">https://www.carlroth.com/de/de/von-a-bis-z/2-propanol/p/cp41.1</a>                                                                                                                                                                                                                     |
| HBSS                                       | Thermo Fisher Scientific            | 14025-050      | <a href="https://www.thermofisher.com/order/catalog/product/14025100#/14025100">https://www.thermofisher.com/order/catalog/product/14025100#/14025100</a>                                                                                                                                                                                                       |
| Protease Inhibitor Cocktail                | Roche Diagnostics                   | 11 836 153 001 | <a href="https://www.sigmaaldrich.com/catalog/product/roche/11836153001?lang=en&amp;region=CA">https://www.sigmaaldrich.com/catalog/product/roche/11836153001?lang=en&amp;region=CA</a>                                                                                                                                                                         |
| Mouse IL-1 beta/IL-1F2 DuoSet ELISA        | R&D systems                         | DY401          | <a href="https://www.rndsystems.com/products/mouse-il-1-beta-il-1f2-duoset-elisa_dy401">https://www.rndsystems.com/products/mouse-il-1-beta-il-1f2-duoset-elisa_dy401</a>                                                                                                                                                                                       |
| Mouse CXCL4/PF4 DuoSet ELISA               | R&D systems                         | DY595          | <a href="https://www.rndsystems.com/products/mouse-cxcl4-pf4-duoset-elisa_dy595">https://www.rndsystems.com/products/mouse-cxcl4-pf4-duoset-elisa_dy595</a>                                                                                                                                                                                                     |
| TAT ELISA Kit                              | Novus Biologicals                   | NBP2-60582     | <a href="https://www.novusbio.com/products/tat-elisa-kit_nbp2-60582">https://www.novusbio.com/products/tat-elisa-kit_nbp2-60582</a>                                                                                                                                                                                                                             |
| Mouse IL-18 ELISA Kit                      | Medical and Biological Laboratories | 7625           | <a href="https://www.mblbio.com/bio/g/dtl/P/?pcd=7625">https://www.mblbio.com/bio/g/dtl/P/?pcd=7625</a>                                                                                                                                                                                                                                                         |
