# Supplementary material
Source: PubMed Central journal article supplement (PMC8293866)
Supplement: NIHMS1657418-supplement-317219_Uncut_Gel_Blots.pdf [file NIHMS1657418-supplement-317219_Uncut_Gel_Blots.pdf]

# Full unedited immunoblots for Figure 3b

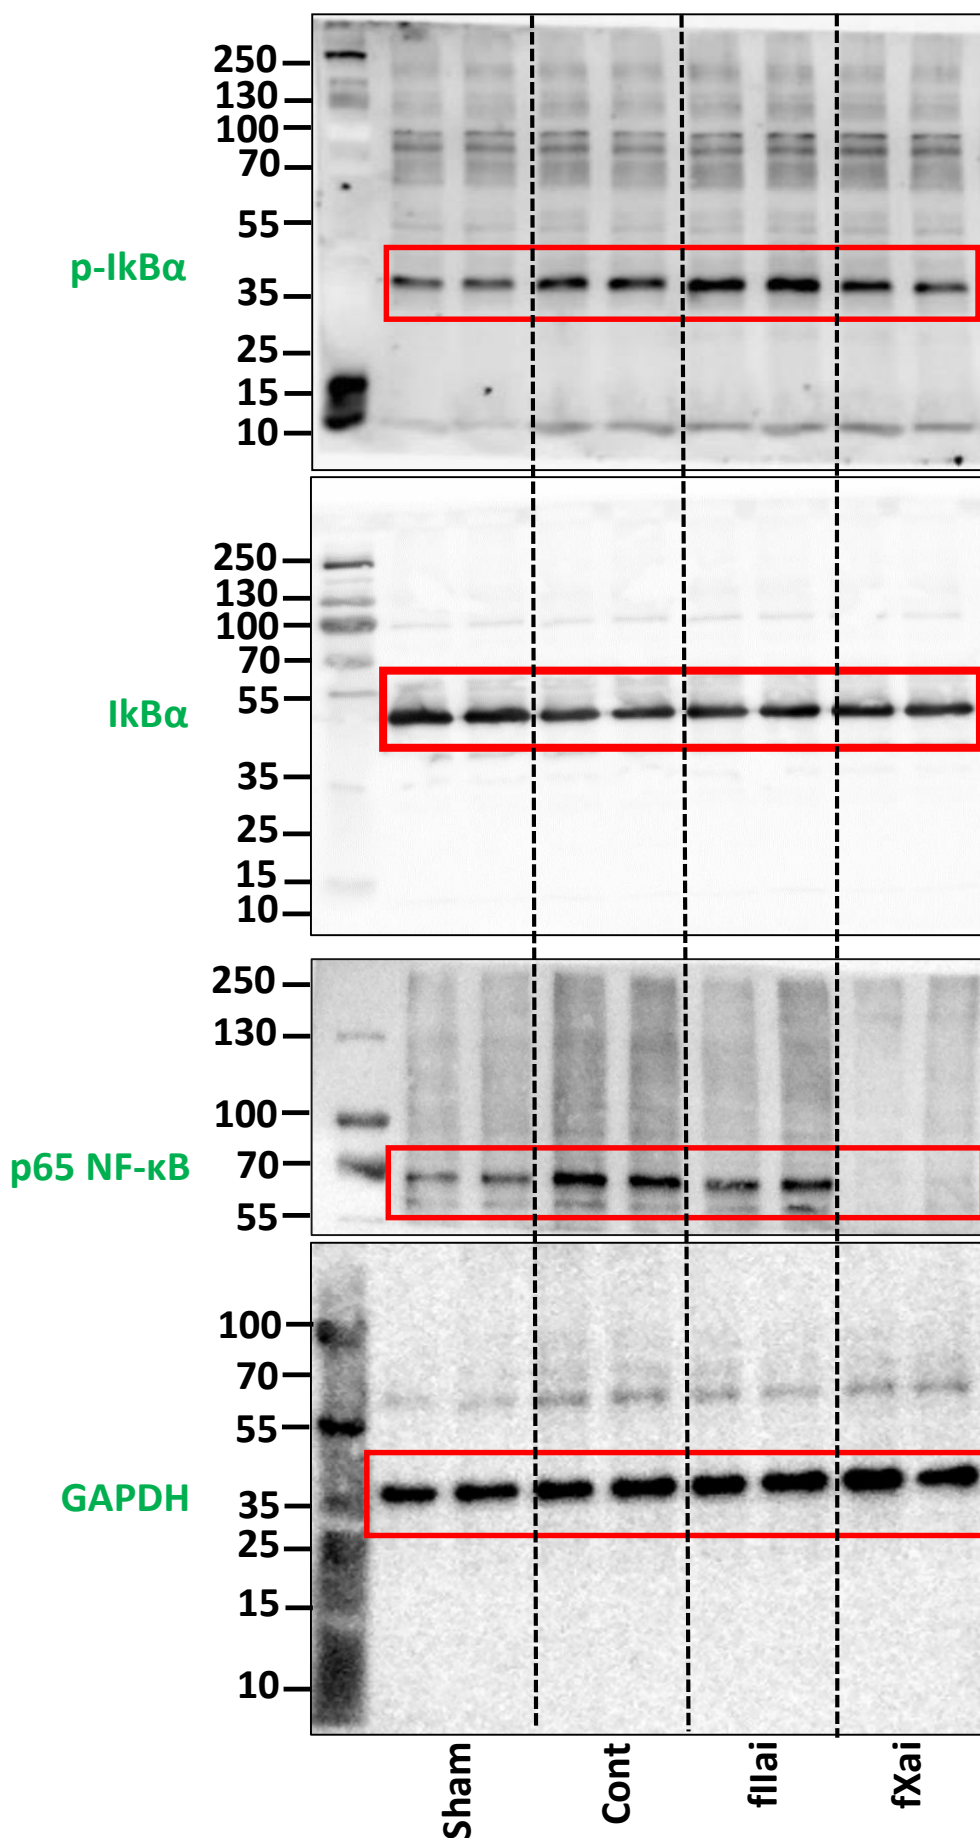

Unedited images of immunoblots in **Figure 3b**. Red boxes indicate the cropped areas shown in the corresponding figure.

# Full unedited immunoblots for Figure 3d

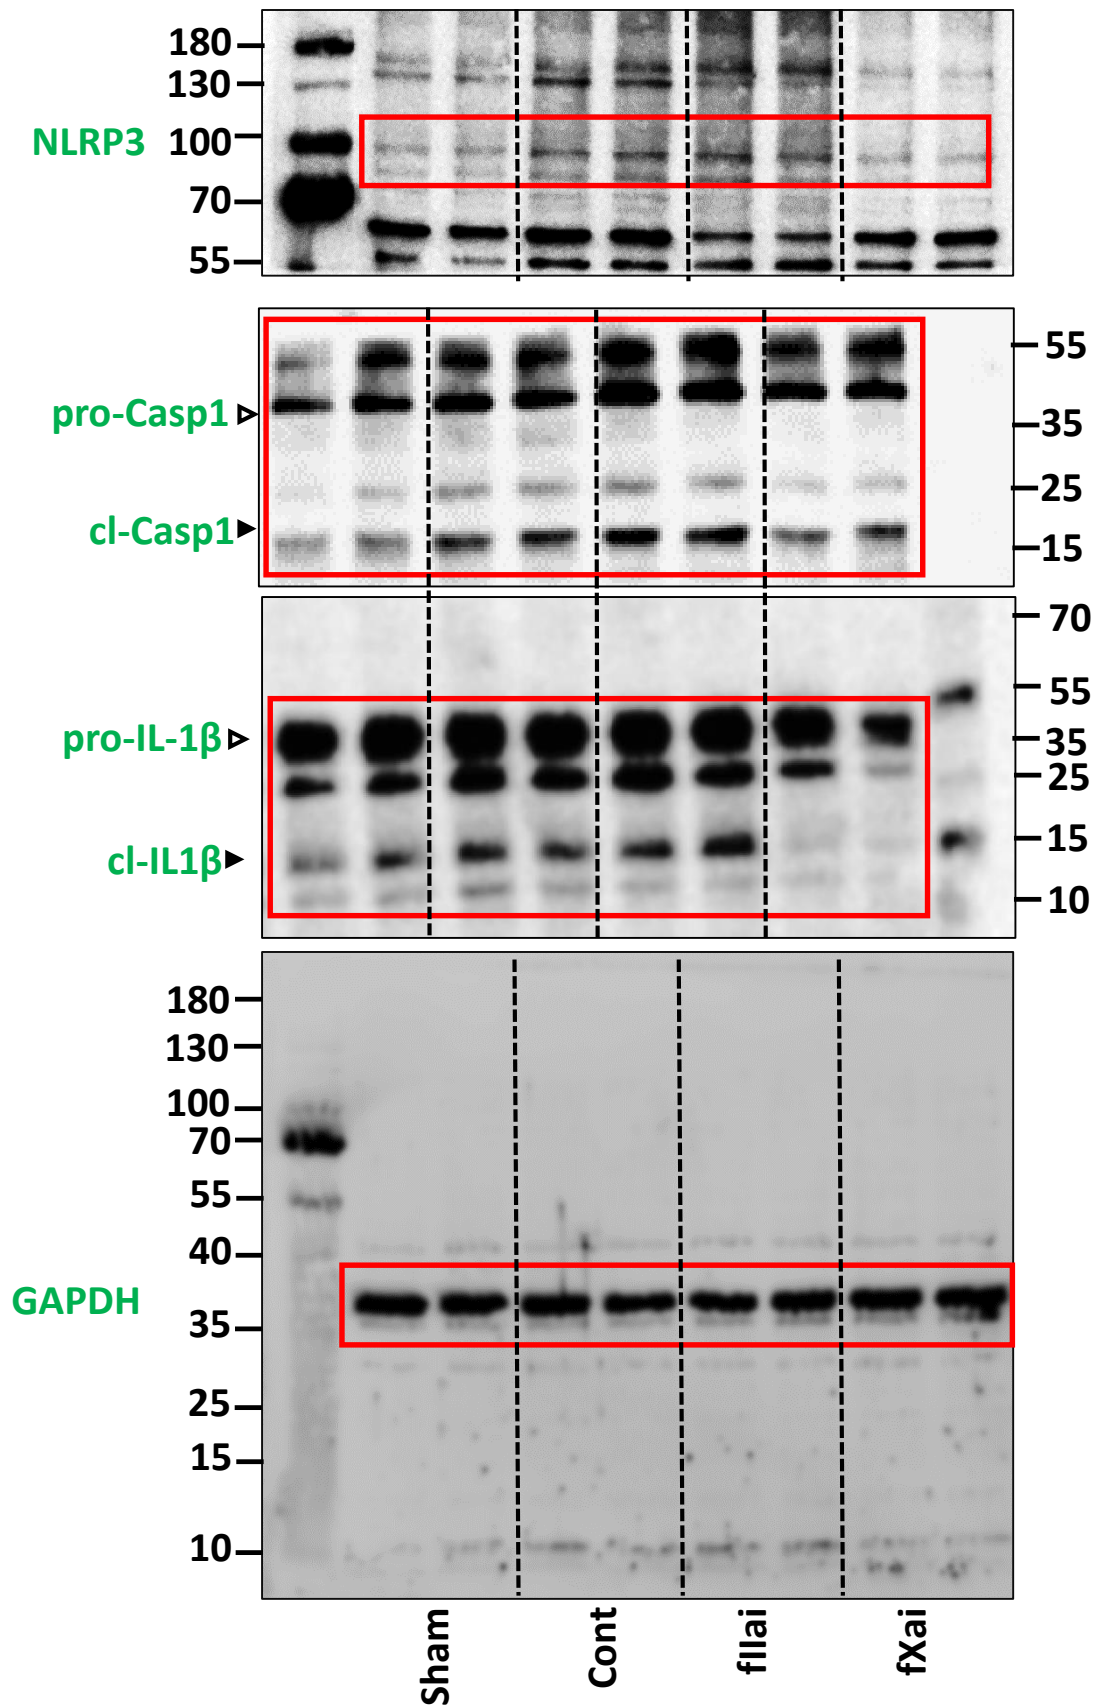

Unedited images of immunoblots in **Figure 3d**. Red boxes indicate the cropped areas shown in the corresponding figure.

# Full unedited immunoblots for Figure 4b

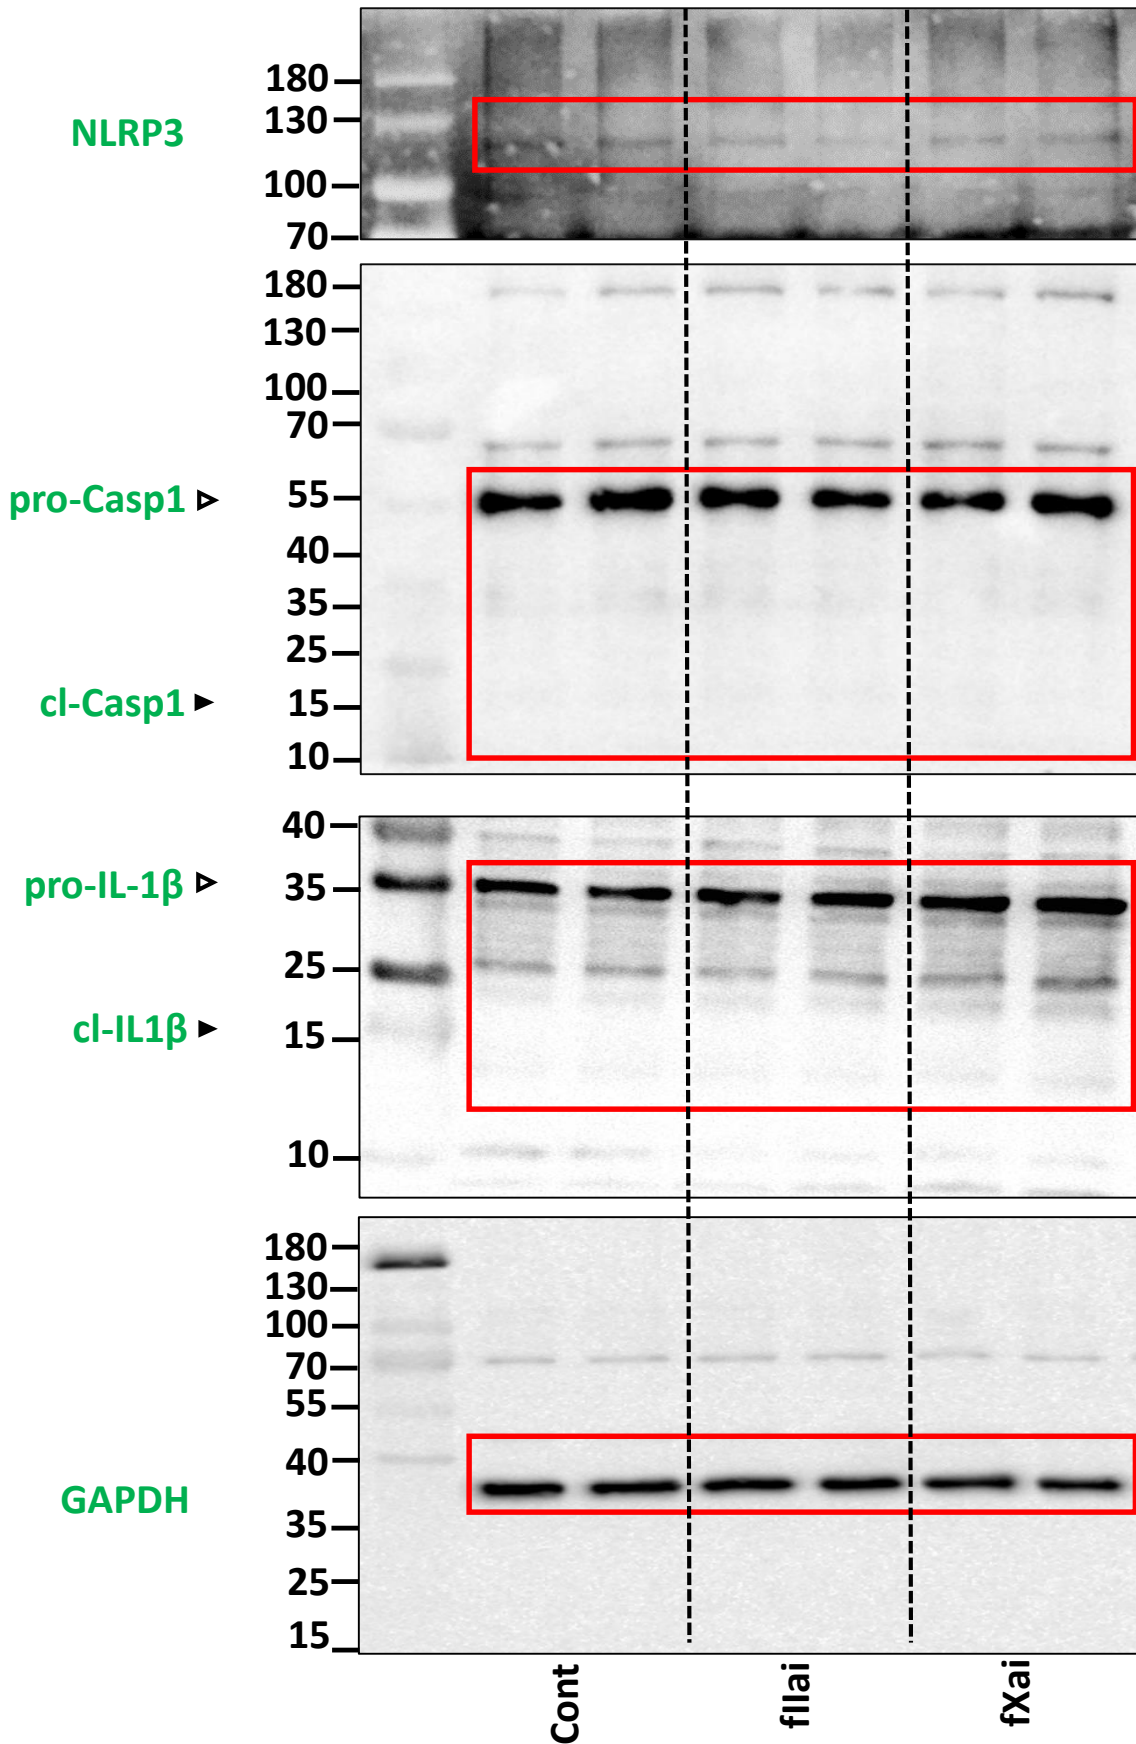

Unedited images of immunoblots in **Figure 4b**. Red boxes indicate the cropped areas shown in the corresponding figure.

# Full unedited immunoblots for Figure 4e

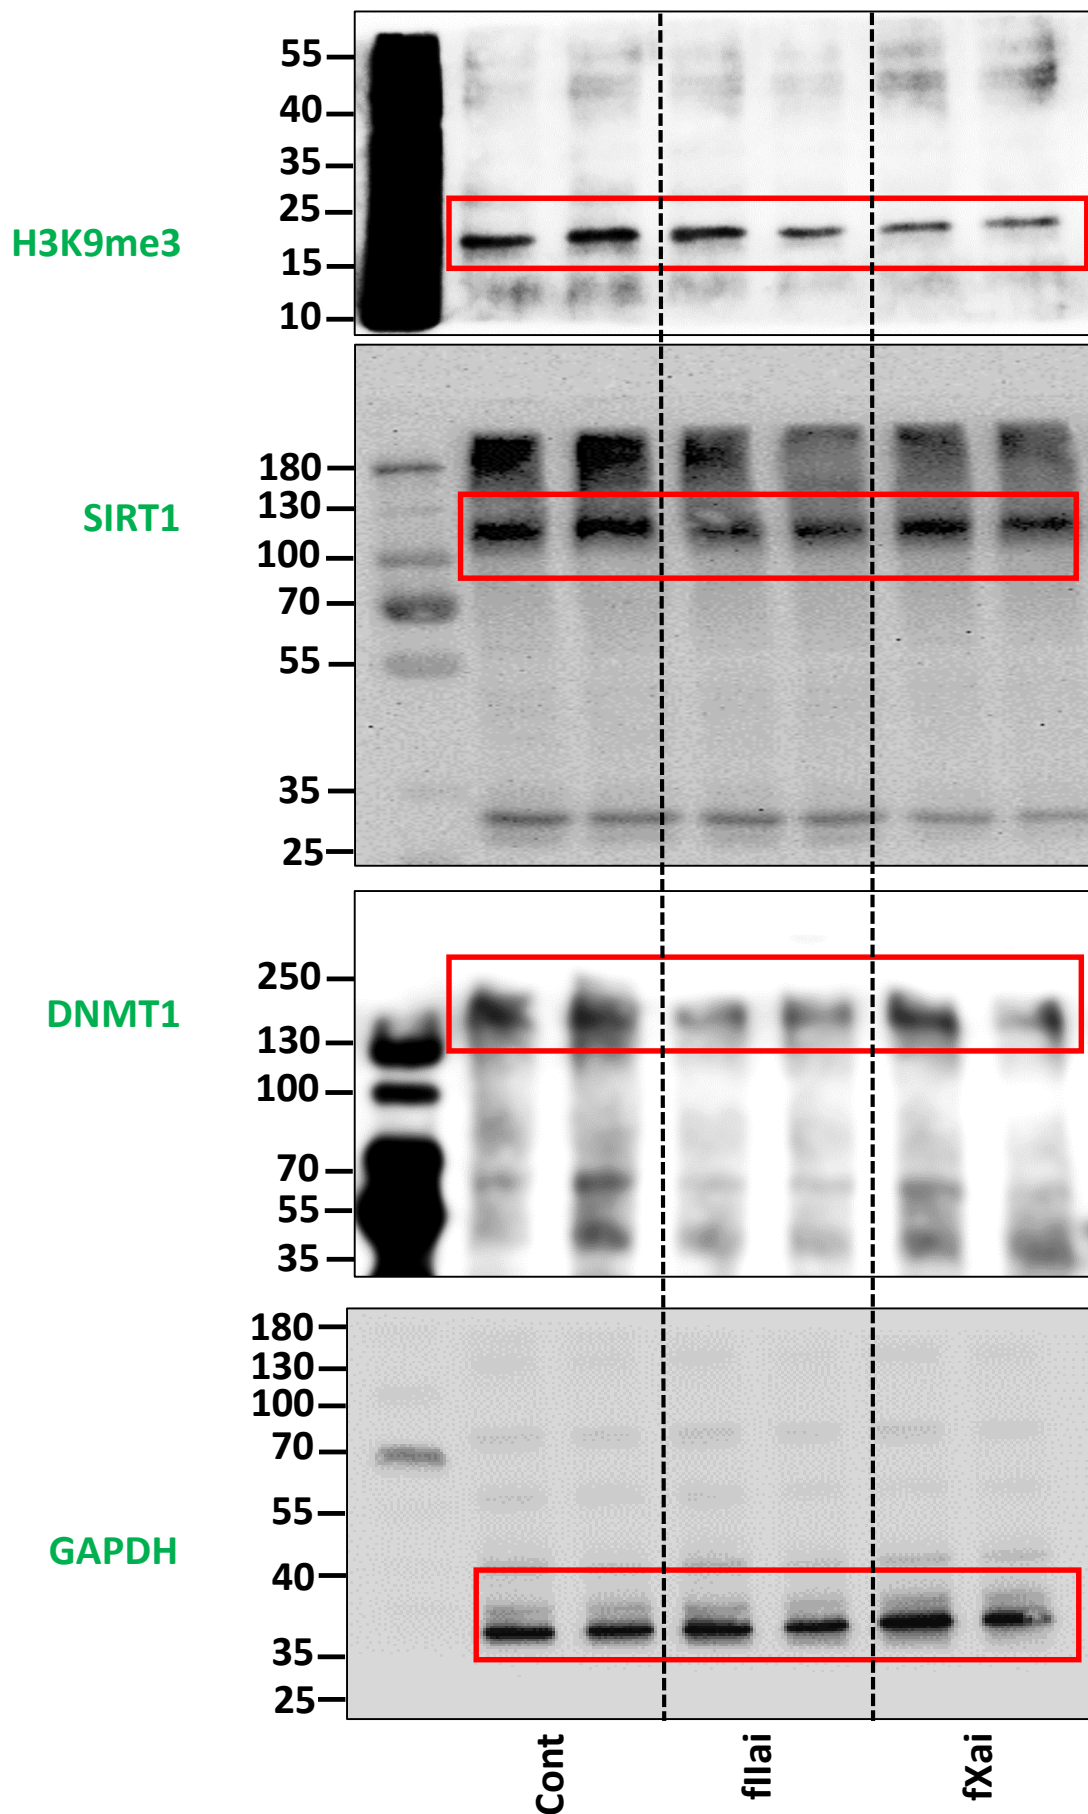

Unedited images of immunoblots in **Figure 4e**. Red boxes indicate the cropped areas shown in the corresponding figure.

# Full unedited immunoblots for Figure 5h

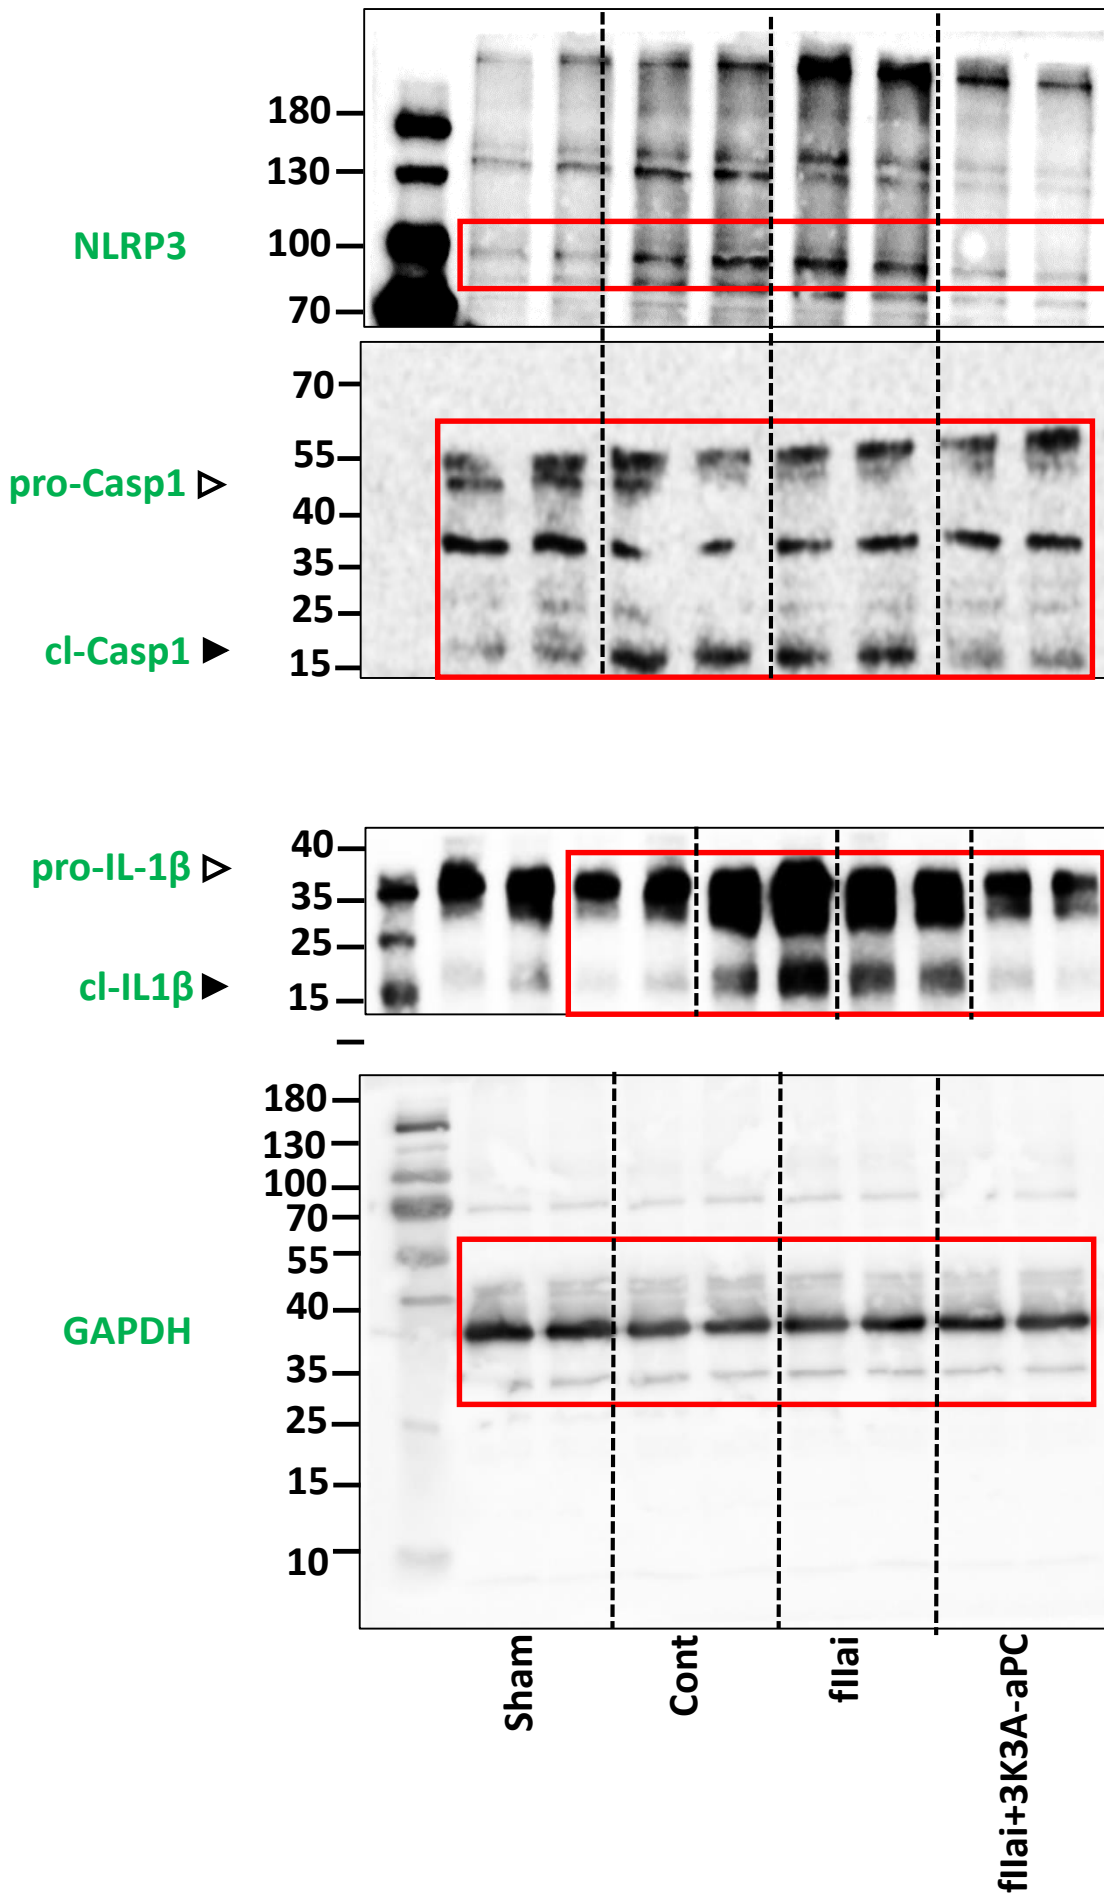

Unedited images of immunoblots in **Figure 5h**. Red boxes indicate the cropped areas shown in the corresponding figure.

## Full unedited immunoblots for Figure 7a

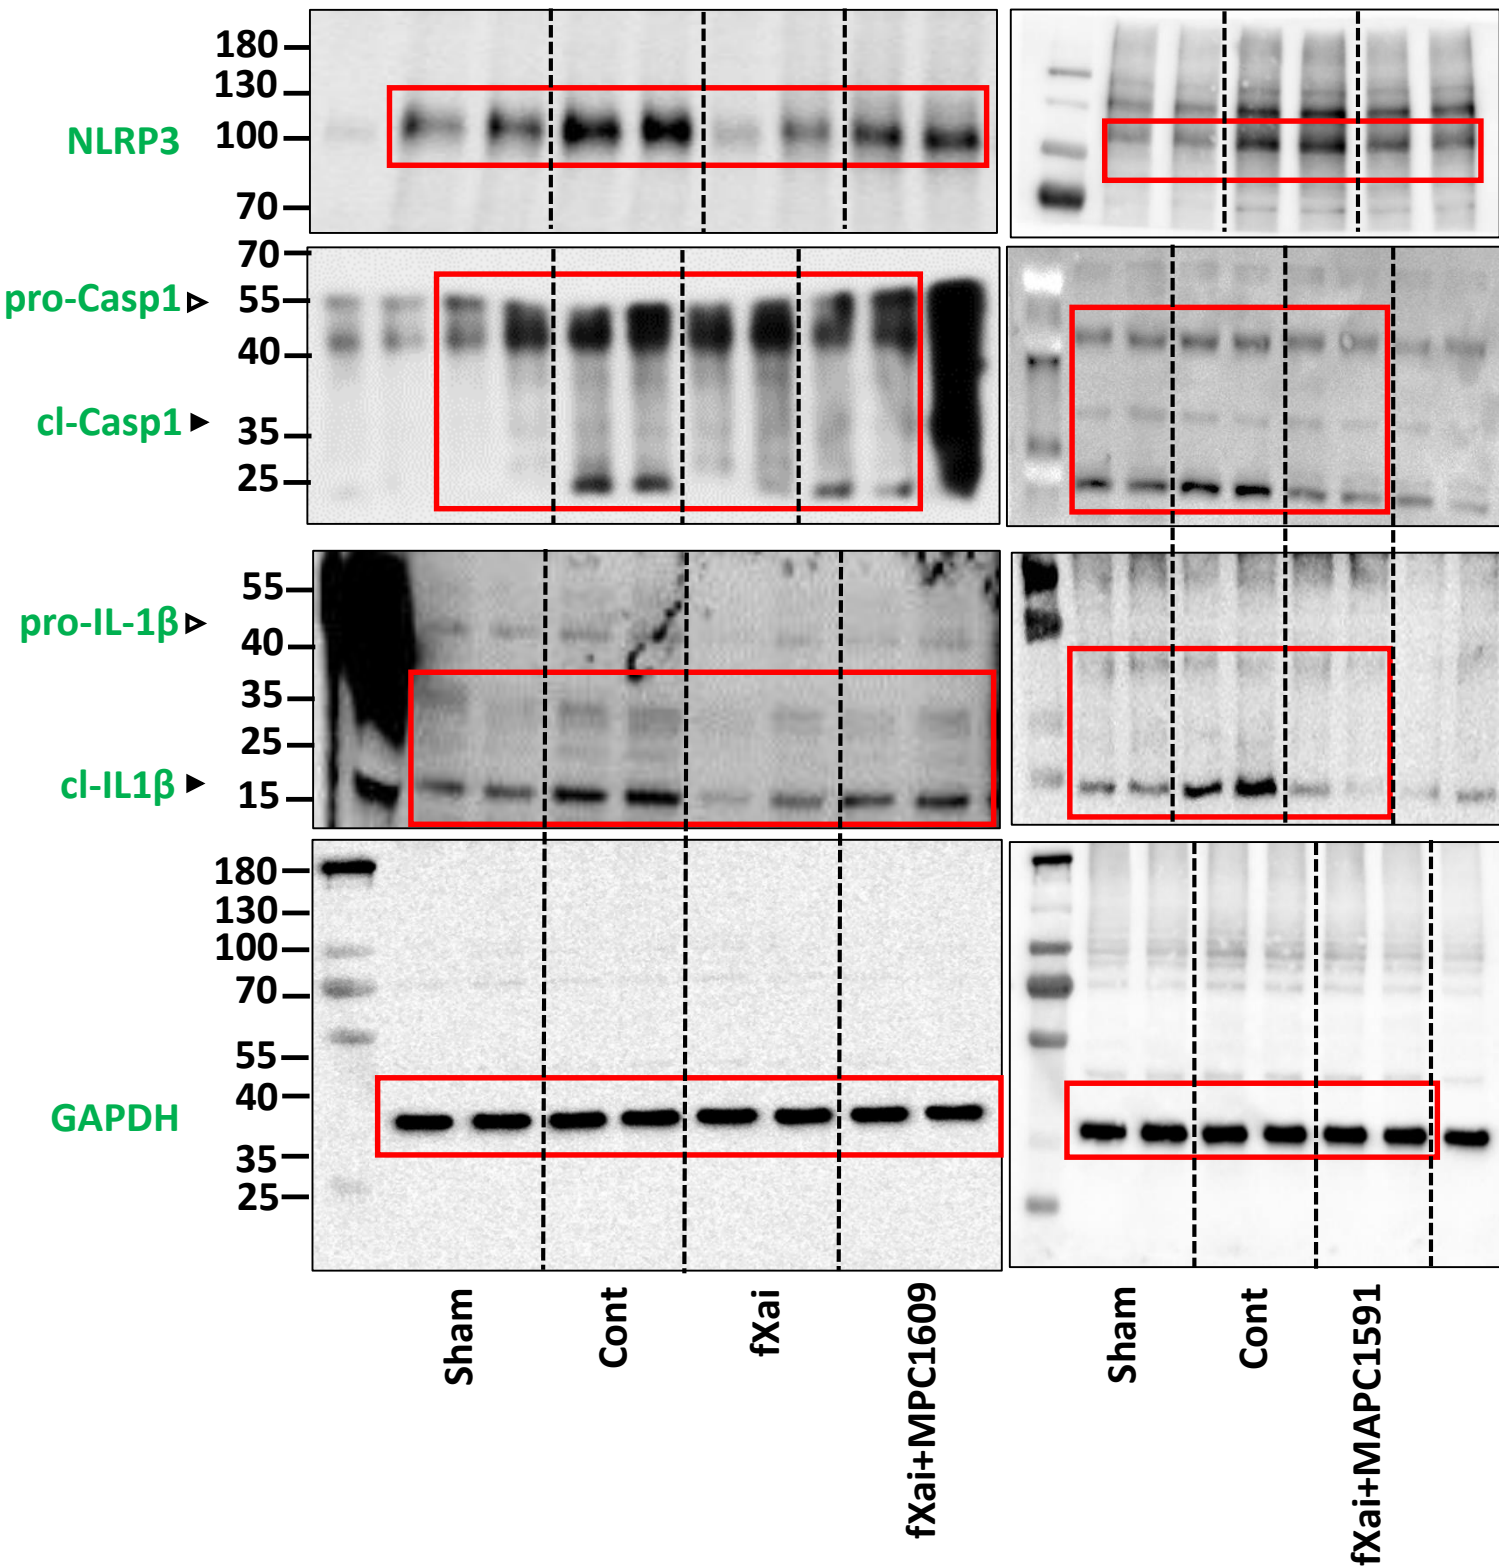

Unedited images of immunoblots in **Figure 7e**. Red boxes indicate the cropped areas shown in the corresponding figure.
